# Supplementary material
Source: MDPI journal article supplement (https://www.mdpi.com/2571-9408/6/5/226)
Supplement: s1 [file s1]

# Los biombos de laca y a imitación de laca en Nueva España

Sonia I. Ocaña-Ruiz

Universidad Juárez Autónoma de Tabasco, División Académica de Ciencias Sociales y Humanidades, 86180 Villahermosa, Mexico; ocanar@gmail.com

**Abstract:** Los biombos fueron muy populares en Nueva España desde fines del siglo XVI. Desde la segunda mitad del siglo XVII, en Nueva España circularon muchos biombos chinos de laca y algunos europeos que inspiraron el desarrollo de biombos novohispanos de laca, al remedo de la laca y achinados. La técnica de los biombos novohispanos de laca que se conservan aún no se ha estudiado, pero las evidencias sugieren que algunos se hicieron con procedimientos de origen precolombino, otros con técnicas de laca europea y otros con pintura y barnices adaptados para producir un brillo parecido al de las lacas. Así, Nueva España fue, en el siglo XVIII, el lugar del mundo donde hubo mayor diversidad de biombos de laca. Hasta ahora, esta diversidad ha permanecido casi inadvertida, pero su estudio es fundamental para advertir hasta qué punto la mundialización del gusto por la laca produjo soluciones novedosas en América.

**Keywords:** Biombo; laca; pintura; Nueva España; maque; novohispano

## 1. Introduction

En la historiografía del arte novohispano, abundan las referencias a los biombos [1] [2] [3] [4] [5], así como a las lacas, principalmente las virreinales hechas en Michoacán y Guerrero [6] [7] [8] [9] [10]. Tanto los biombos como las lacas son fenómenos originalmente asiáticos, que posteriormente se adaptaron y tuvieron un gran desarrollo en Nueva España. Los biombos son muebles plegables, compuestos de entre 2 y 24 hojas que sirven para dividir habitaciones o bien, para desplegarse junto a la pared. Su tamaño, material, técnica e iconografía varía notablemente. Hasta el siglo XVI, todos los centros productores se hallaban en Asia, pero con la expansión europea a Asia y América, el gusto por los biombos se extendió, sobre todo en los ámbitos hispanoamericanos, que en el siglo XVII pasaron de ser centros de consumo a centros de producción.

La laca surgió en el extremo Oriente, donde se usaron resinas vegetales para hacer barnices que protegieran los objetos y, a la vez, produjeran efectos de brillo, transparencia, luminosidad y profundidad. En la América virreinal, las lacas asiáticas fueron conocidas desde fines del siglo XVI, gracias al comercio del galeón de Manila. Poco antes, los conquistadores de América habían encontrado procedimientos de base animal (en el actual México) y vegetal (en Sudamérica) que con el tiempo identificaron como lacas, por su efecto parecido al de las lacas asiáticas [10] [11]. El conocimiento de las lacas asiáticas inspiró el desarrollo de lacas europeas, a partir del siglo XVII; estas últimas y sus técnicas de elaboración, distintas a las asiáticas [12], se conocieron en Nueva España en el siglo XVIII [13] [14] [15].

Así, en la América virreinal coexistieron distintos tipos de lacas. El nombre que recibían era “maque”, tomado de las lacas japonesas *makie* [15] (p. 145). A menudo la palabra “maque” se ha asociado a las técnicas regionales de origen precolombino [15] (p. 145, nota 60). Sin embargo, el análisis documental demuestra que en realidad esa palabra se usó de

Citation: Ocaña-Ruiz, S.I. Lacquer and Imitation Lacquer Folding Screens in New Spain. *Heritage* 2023, 6, 4282–4299. <https://doi.org/10.3390/heritage6050226>

Academic Editor: Lucia Burgio, Dana Melchar and Monica Katz

Received: 14 January 2023

Revised: 7 April 2023

Accepted: 8 April 2023

Published: 11 May 2023

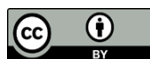

**Copyright:** © 2022 by the authors. Submitted for possible open access publication under the terms and conditions of the Creative Commons Attribution (CC BY) license (<https://creativecommons.org/licenses/by/4.0/>).

manera muy liberal pues, lejos de remitir a una técnica particular, se relacionó con distintos tipos de obras que compartían el efecto de brillo.

En los documentos novohispanos del siglo XVIII, las referencias a los biombos de laca incluyen los términos maque, maqueado, amaqueado, amacado, con pintura maqueada y al remedo de maque, fingido de maque. Estos términos se usan indistintamente; las técnicas y procedimientos no se distinguen claramente entre sí pero, en conjunto, demuestran el enorme éxito de los biombos de laca en la Nueva España del siglo XVIII. En esta etapa de la investigación, en la que aún no se han hecho estudios técnicos, no es posible definir con claridad cada una de estas producciones. Sin embargo, a lo largo del texto se prestará mucha atención y se mantendrá la fidelidad a los términos específicos usados en cada caso.

Entre principios del siglo XVII y fines del siglo XVIII, en Nueva España se multiplicaron las técnicas, iconografías, materiales y usos de los biombos. En el siglo XVIII cobraron mayor importancia las lacas asiáticas hechas para el mercado hispanoamericano, así como las lacas de técnica europea; ambas influyeron en los biombos novohispanos de laca. De igual modo, en Uruapan, Peribán, Pátzcuaro (actual estado de Michoacán), Olinalá (actual Guerrero) y Chiapa de Corzo (Chiapas) se hicieron objetos con técnicas de laca de origen prehispánico, a base de aceite de chía o linaza y la grasa extraída de la hembra del insecto axe. Estas técnicas no tienen nada que ver con ni con las lacas asiáticas ni con las europeas. La importancia de estas lacas es indiscutible, pero cada vez salen a la luz más biombos y otros muebles virreinales de laca de gran tamaño, como roperos, que se hicieron con distintas técnicas, entre las que destacan los procedimientos de laca y pintura de origen europeo. El estudio conjunto de estas obras es indispensable para conocer mejor los alcances del gusto por la laca en Nueva España.

Las primeras lacas asiáticas que circularon en grandes cantidades en Europa y América fueron las japonesas. Pero a partir de la segunda mitad del siglo XVII, los biombos chinos de laca fueron muy conocidos tanto en Europa como en América. En Nueva España, los biombos y las lacas se desarrollaron de manera independiente, pero en el siglo XVIII, el éxito de los biombos de laca china estimuló la producción de biombos novohispanos de laca, o a imitación de laca. No hay indicios de que esta clase de biombos se hicieran en el siglo XVII; es decir, su detonante fueron los biombos chinos de laca.

Los biombos novohispanos de laca y los que imitan la laca han recibido relativamente poca atención, a pesar de que se conocen varios ejemplares y decenas de referencias documentales a ellos. En Nueva España los primeros biombos de laca conocidos fueron los chinos (FIG. 1), pero también circularon algunos europeos. En las ciudades grandes, los pintores y carroceros hacían biombos a petición de los clientes, y lo mismo ocurría en los talleres de laca de Michoacán y Guerrero. Así pues, a mediados del siglo XVIII, en Nueva España circulaban, además de biombos de laca chinos e ingleses, distintos tipos de biombos virreinales. Como muchas obras se hacían sobre pedido, había gran diversidad: los biombos de laca podían destinarse al estrado, al dormitorio o a otros lugares de la casa; el número de hojas variaba entre 6 y 24 y podían estar decorados por un solo lado o por los dos. Algunos biombos de laca eran de lujo -los biombos importados costaban hasta 500 pesos-, pero otros podían costar menos de diez pesos.

A medida que avanzan los estudios técnicos sobre las lacas asiáticas, europeas y americanas, se advierten mejor sus grandes variaciones en cuanto a materiales y procedimientos. Este estudio no se plantea describir todas las técnicas de laca usadas en los biombos novohispanos, sino advertir que en Nueva España los biombos de laca tuvieron un enorme éxito que llevó a una diversificación técnica que aún desconocemos y en la que es necesario profundizar. También se pretende mostrar que, aunque sin duda los biombos chinos de laca fueron la fuente de inspiración de los biombos novohispanos de laca, en la

mayoría de los casos no se intentó copiarlos, sino que se seleccionaron algunas de sus características -el color y ciertas figuras- para recontextualizarlas en obras que, en general, resultan mucho más próximas al arte novohispano que al chino.

Es importante señalar que no todo el maque virreinal es achinado; muchas lacas novohispanas no muestran ningún parecido con las lacas asiáticas. Esto incluye una parte del trabajo de Pátzcuaro, que es el que más a menudo se ha considerado achinado. A la vez, el fenómeno de lo achinado comprende distintos tipos de objetos, no solo aquellos de laca. El fenómeno de los biombos de laca en Nueva España comprende los ejemplares hechos con técnicas de origen prehispánico, pero va mucho más allá. Aunque muchos estudiosos del arte virreinal habían creído que los biombos novohispanos de laca se hicieron en Pátzcuaro[18], al respecto las evidencias son muy recientes. En 2022, Ronda Kasl recuperó una fuente de 1778, *Tardes americanas*, donde se menciona un rodastrado de laca hecho en la segunda mitad del siglo XVIII para la marquesa de Cruillas, esposa del virrey de Nueva España (1760-1766) [16] [17]. Sin embargo, esta producción era solo una entre varias que se dedicaron a los biombos de laca. Desde fines del siglo XVII se hicieron biombos de laca en España y en este texto se examinan evidencias que sugieren que algunos biombos novohispanos de laca se relacionan con los ejemplares europeos.

La diversidad de técnicas y centros productores aún no ha sido considerada en la historiografía, y para aquilatar su verdadera importancia es necesario estudiar los biombos de laca en conjunto, pues solo así se puede advertir su enorme éxito en Nueva España. Si bien en Europa los biombos chinos de laca circularon profusamente, fue en Nueva España donde su éxito dio lugar a una diversidad de biombos que, aunque se inspiraron en los chinos, nunca se limitaron a copiarlos. En conjunto, los biombos novohispanos de laca y aquellos pintados a imitación de la laca demuestran que el mercado hispanoamericano del arte asiático era muy extenso y los gustos de la América virreinal son un aspecto tan significativo como poco conocido de la “mundialización artística” del siglo XVIII.

En Europa, la laca de los siglos XVI-XVIII se suele plantear como un fenómeno asiático y europeo, mientras que en América, se consideran casi exclusivamente las lacas asiáticas y las virreinales de origen precolombino. La relación comercial directa entre Filipinas y Nueva España fomentó el desarrollo de fenómenos particulares, como los biombos novohispanos de laca, cuya diversidad demuestra hasta qué punto las lacas virreinales agregaron otros fenómenos al de por sí rico contexto mundial de la laca de la época. El estudio de estas obras permite entender mejor la “primera mundialización” del arte en general y de la laca en particular.

## 2. Materiales y métodos

La información documental usada para este estudio sobre la existencia de biombos de laca en Nueva España se reunió de distintas fuentes, tanto publicadas como inéditas, de mediados del siglo XVII a fines del siglo XVIII. Las fuentes inéditas proceden del Archivo General de la Nación de México (AGNM), el Archivo General de Notarías (AGNot) y el Archivo de Notarías de Puebla. Las fuentes publicadas se citan en el texto. El artículo discute referencias documentales a 27 biombos de laca chinos de once inventarios de bienes novohispanos de 1695-1792. Seis de ellos son inéditos. También se discuten las referencias documentales a quince biombos de laca novohispanos de 1696-1737. Diez de ellos eran inéditos, mientras que los otros tres ya habían sido publicados. Asimismo se consideran las referencias a doce biombos novohispanos achinados de once inventarios de bienes de 1716-1787. Cinco de ellos eran inéditos.

La información documental discute las características de distintas clases de biombos de laca y a imitación de laca que se han conservado en distintas colecciones públicas de

México, Estados Unidos y Europa. El propósito de este artículo no es hacer una revisión exhaustiva del fenómeno de los biombos de laca en la Nueva España, pues el fenómeno fue muy amplio y requiere mayor investigación documental, así como estudios técnicos. No obstante, intento presentar información tanto de los documentos como de las obras conservadas de ambas categorías, y derivar conclusiones generales a partir de ellas.

### 3. Results

#### 3.1 *Lacas y biombos en Hispanoamérica: un panorama general*

En Nueva España, los biombos y las lacas se conocieron a fines del siglo XVI, gracias al intercambio comercial con Manila. Desde el principio, ambos tuvieron un enorme éxito. Los primeros biombos y las primeras lacas que se conocieron en América fueron ‘japoneses’ [19]; unos y otros inspiraron distintos tipos de obras novohispanas [20] [21]. En Nueva España, los biombos se diversificaron, pues surgieron los rodastrados, decorados por un solo lado y usados para rodear las paredes del salón del estrado, destinado a las mujeres. Como los estrados se elevaban sobre una tarima, los rodastrados eran biombos bajos, de entre 83.6 cm y 139 cm. También surgieron los biombos de cama, que eran muy altos (medían entre 205 y 250 cms). Asimismo, se popularizaron los biombos de dos haces, que estaban tan decorados en el anverso como en el reverso. Había biombos pintados que representaban distintos temas, así como algunos hechos de brocado y otras telas. Muchas obras no tenían relación con los biombos asiáticos, más allá del uso del mismo tipo de mueble como soporte.

En la historiografía internacional, los biombos de laca más conocidos son los chinos de Coromandel, que en Europa a menudo se desarticulaban para decorar con sus paneles muebles y muros (FIG. 2). El caso de España es particular, pues no solo esas desarticulaciones estuvieron menos extendidas que en otros ámbitos europeos, sino que también circularon distintos tipos de biombos españoles y americanos, incluyendo ejemplares de laca. Así pues, los biombos fueron especialmente gustados en Nueva España, pero también en España donde, más allá de la laca, entre los siglos XVII y XVIII se hicieron más biombos que en cualquier otra nación europea [22].

En Nueva España, los precios de los biombos de laca chinos van de los 50 a los 500 pesos, mientras que los de laca virreinal van de los 8 a los 80 pesos, pero pocas veces superan los 25 pesos. Es decir, si bien los biombos chinos eran mucho más caros que los novohispanos, también hay grandes contrastes de precios entre los propios biombos chinos. Esto se advierte incluso en obras de descripciones similares, lo que sugiere que los tasadores -y los consumidores- prestaban mucha atención a las características de las obras individuales. Entre los valuadores de los objetos asiáticos había vendedores de El Parián, el mercado especializado en productos asiáticos, quienes poseían conocimientos que les permitían distinguir la calidad de las obras. Los biombos novohispanos, en cambio, solían ser apreciados por pintores, lo que sugiere que la mayoría de las obras eran hechas por esa clase de artistas.

#### 3.2 *Biombos asiáticos de laca para el mercado Hispanoamericano*

La historiografía internacional ha estudiado ciertas producciones asiáticas hechas para mercados europeos, como el inglés y el holandés [23] [24] [25]. También hubo obras adaptadas al mercado hispanoamericano, pero son poco conocidas fuera del mundo hispanoparlante. Entre ellas destacan los biombos de laca. En 1769, en el cargamento del galeón Nuestra Señora del Carmen había, entre otros materiales venidos de Manila a Acapulco,

“un cajón con cincuenta y dos hojas de loza de maque colorado para dos beobos” [4] (pp. 37–38). Al año siguiente se embarcó en Manila rumbo a Acapulco un “beobo de maque colorado con flores doradas de dos caras de 24 hojas” [26].

Los biombos de más de veinte hojas aparecen con relativa frecuencia en los ajuares novohispanos, pero son muy raros en otros ámbitos. El “beobo de maque colorado con flores doradas de dos caras de 24 hojas”, seguramente se destinó a dividir una habitación de gran tamaño. Los biombos de más de 20 hojas son poco frecuentes; a menudo se trata de rodastrados, pero en este caso no es así, porque la obra estaba trabajada por ambos lados. Esto permite suponer que la obra fue un encargo. Se sabe poco sobre los trabajos asiáticos hechos por comisión para los comitentes novohispanos. Baena Zapatero ha planteado la posibilidad de que este biombo se haya hecho en Manila [4] (pp. 37–38). La posibilidad es sugerente, pues Manila no fue solo un centro de distribución de productos asiáticos, sino también un centro de producción. Más allá de los sangleyes del Parián, se desconoce hasta qué punto los residentes de Manila – ya fuera de origen chino o filipino– se involucraron directamente en la elaboración de obras para el mercado novohispano. Sin embargo, por la importancia de ese mercado y porque Manila vivía en buena medida a partir del comercio, es lógico suponer que algunas obras asiáticas enviadas a Nueva España –sobre todo las que no eran muy costosas– se habían hecho en esa ciudad. Si la producción filipina incluye los biombos de laca es algo que deberá discutirse en el futuro, a la luz de más evidencias.

Los biombos chinos de laca roja circularon poco fuera de Hispanoamérica, pero fueron muy populares en Nueva España en el siglo XVIII. Como se aprecia en la siguiente tabla, a menudo se trata de obras de lujo:

**Tabla 1**

| Chinese Lacquer Screen Description                                                                                                                                                                                                                                                                                                                                                                       |
|----------------------------------------------------------------------------------------------------------------------------------------------------------------------------------------------------------------------------------------------------------------------------------------------------------------------------------------------------------------------------------------------------------|
| “Un rodastrado de maque encarnado también de China de 12 tablas” y “un biobo de maque encarnado de china de 10 tablas”. [27]                                                                                                                                                                                                                                                                             |
| “Un biombo de China, maqueado de encarnado y oro, con doce tablas y sus remates dorados en 300 pesos” y “Un biombo nuevo, de la China, maqueado de encarnado y dorado, de dos varas y tres cuartas de alto, con doce tablas y sus remates dorados en 500 pesos”. [2] (p. 29)                                                                                                                             |
| “Un rodastrado de la misma fábrica, con veinticuatro tablas, de maque encarnado y dorado, y sus remates de lo mismo en 500 pesos”, “Yt un biobo de China, maqueado de encarnado y oro, con doce tablas, y sus remates dorados, en 300 pesos” e “Yt un biobo nuevo de China, maqueado de encarnado y dorado de dos varas y tres cuartas de alto con doce tablas y sus remates dorados en 400 pesos”. [28] |

Sin duda, los rodastrados chinos de laca roja arriba mencionados fueron hechos para el mercado novohispano de lujo. Por los precios, de entre 300 y 500 pesos, podría incluso tratarse de obras hechas sobre pedido. Tanto la marquesa de Altamira como el marqués de Guardiola eran personajes de alto poder adquisitivo y relevancia social [29]. El contacto directo con Manila facilitó la circulación de obras asiáticas, que circularon profusamente durante buena parte de la época virreinal. De ahí que los comitentes novohispanos desarrollaran sus propios gustos, lo que dio lugar a obras de características ajenas a las de otros contextos.

También son de interés los biombos chinos de laca de dos haces que combinan los fondos negros y rojos. En 1737 Joseph del Barrio, caballero del Orden de Santiago, tenía

“Un biobo de tableros de doce hojas de China de maque encarnado y oro por un haz y por el otro negro en 250 pesos” y “Un biobo de maque de China de dos haces, con doce tablas, carmesí y negro, se avaluó en 90 pesos” [30]. Si bien esta clase de biombos son poco comunes, el Museu do Oriente de Lisboa conserva un ejemplar chino de laca cuyo anverso es rojo, rodeado por una cenefa negra, mientras que el reverso es negro. La obra muestra en el anverso una vista de Macao y en el reverso una de Cantón. Aunque esta última ciudad era un enclave para el mercado internacional, Macao lo era para mercado ibérico, lo que sugiere que este biombo -como los de Joseph del Barrio- podría haberse destinado a ese mercado.

Al respecto, también resulta sugerente un biombo indoportugués de laca roja y negra, que representa personajes portugueses y tiene remates polilobulados [31]. Muchos biombos novohispanos del siglo XVIII tienen remates parecidos. Esto no ocurre en los biombos del siglo XVII, lo que permite suponer que los del siglo XVIII tomaron la solución de los ejemplares asiáticos de esa época. A Manila llegaban distintos productos controlados por los portugueses, así que es posible que los biombos descritos en los documentos novohispanos hayan sido similares al biombo chino y el indoportugués.

Por otro lado, en Nueva España también circularon biombos chinos de laca negra. En el exvoto de la Virgen de Taltocán, de José de Páez (1751) se puede ver un biombo de cama de laca negra [32]; al parecer, se trata de un mueble chino, no novohispano achinado. Asimismo, en 1729, la marquesa de Altamira tenía “otro dicho [rodastrado de China] de maque negro con 22 tablas” [27] y en 1751 el marqués de Guardiola poseía “Yt otro biobo de China negro y dorado de 2 varas y tres cuartas de alto, con 12 tablas, en 200 pesos” [28]. Estas referencias son menos numerosas que aquellas a biombos chinos de laca rojo. Es probable que estos últimos fueran más populares, pero como se puede ver en la siguiente tabla, muchas referencias a biombos chinos de laca no mencionan el color y sin duda algunos de ellos fueron negros.

**Tabla 2 Biombos de laca china**

| Chinese Lacquer Screen Description                                                                                                 |
|------------------------------------------------------------------------------------------------------------------------------------|
| “Un arrimador de maque de China, con 23 tablas, de vara y media de alto, apreciado en 115 pesos”. [33]                             |
| “Ytem un biobo de maque de China de doce tablas de tres varas de alto apreciado en ciento cincuenta pesos [...]”                   |
| “Ytem un arrimador de maque de China con veinte y tres tablas de vara y media de alto apreciado en ciento y cincuenta pesos”. [34] |
| “Un biombo. De maque de China, de seis tablas en 50 pesos.” [35]                                                                   |
| “Otro dicho, también de maque de China, mayorcito, en 240 pesos.” [2] (p. 32)                                                      |
| “208. Un biombo de maque de China de dos haces, en 200 pesos”                                                                      |
| “209. Otro dho también de maque de China mayorcito en 240 pesos” [36]                                                              |

Como en el caso de los biombos antes discutidos, aquí también hay mucha diversidad en cuanto al uso, número de hojas, tamaño y precio de las obras. Destaca el caso del arrimador que en 1695 pertenecía a la marquesa de San Jorge y que fue heredado por su tío, Bentura de Paz. En 1704, la obra se apreció en 150 pesos, mientras que en 1695 se había valuado en 115 pesos. Esto es algo excepcional, pues en el documento de 1704 muchos bienes sufrieron una depreciación respecto a 1695 [37]. Con el tiempo, si las obras están en buen estado, a menudo los precios se mantienen, pero no se incrementan, como ocurre

en el caso de los dos biombos que en 1784 aparecen entre los bienes del conde de Xala y en 1792 figuran en el ajuar de su viuda con el mismo precio.

Dado que ninguna de las referencias menciona el relieve característico de los biombos de Coromandel, cabe suponer que estos circularon poco en Nueva España. Como se ha visto, los novohispanos más prósperos pagaron hasta 500 pesos por los biombos de laca chinos, por lo que la escasa circulación de los ejemplares de Coromandel probablemente se deba a que en Nueva España se prefirieron las obras adaptadas a sus propios gustos, como los rodastrados, los biombos de dos haces y los de fondo rojo.

### 3.3 Biombos europeos de laca

Los biombos europeos de laca han recibido poca atención, a pesar de que hay pruebas de su existencia en Italia [38], Francia [38] (p. 78), Inglaterra [15] (pp. 170 y 172) y Alemania [39]. Estas obras derivan de las técnicas europeas de laca. En España los biombos de laca, tanto asiáticos como europeos, fueron relativamente populares, sobre todo en la corte de Isabel de Farnesio [40] [41]. Pero el gusto por ellos es anterior: en el inventario de bienes hecho a la muerte de Jerónimo de Eguía (1682), caballero del Orden de Santiago y consejero de Indias, se menciona “un biobo de Madrid de ocho hojas, de vara de ancho cada una y dos varas y cuarta de alto, por el haz dorado y pintado de diversos colores y por el revés enbarnizado con pinturas negras” [38] (p. 163). El documento menciona otro biombo barnizado, pero especifica que era de la India. La obra no se conserva, pero la referencia a Madrid permite suponer que fue decorada en la capital española con técnicas locales de laca [42].

Años después, Isabel de Farnesio tuvo biombos de laca, hechos en Italia y España. La afición de la reina a las lacas y a la *chinoiserie* es bien conocida [40], por lo que su gusto por los biombos europeos de laca no resulta sorprendente. El inventario de bienes hecho a su muerte, en 1746, registra “Un biombo de charol con ocho hojas, fondo color de perla matizado con diferentes figuras, y flores de papel cortado a dos haces tiene cada hoja un pie y nueve dedos de ancho seis y seis de alto” [38] (p. 391); en este caso, como ha advertido Ordóñez Goded, la referencia al “papel cortado” corresponde a la *lacca povera* italiana [38] (p. 391). El mismo documento consigna “otra mampara nueva ejecutada en el Real Sitio de San Ildefonso, fondo negro, matizado de ramos dorados, flores de distintos colores, y pájaros, todo de realce, con copete de lo mismo, y un canastillo de fruta en el medio” [38] (p. 392). También hay indicios de que en 1736, la reina había mandado a aparejar un biombo europeo de laca [42] (p. 79).

Pero no solo Isabel de Farnesio gustó de estas obras. Cuando su sucesora Bárbara de Braganza murió en 1758, tenía “un biombo de seis hojas que por un lado es de color aceituna y por el otro de limón, el cual tiene ramos de oro y es todo de charol con una guarnición de madera tallada en blanco” [38] (p. 392). Es interesante advertir que las lacas europeas empleaban los colores perla, aceituna y limón, a diferencia de las asiáticas, cuya paleta era mucho más restringida [42] (p. 81). Es decir, las lacas europeas, como las novohispanas, no se limitaron a imitar los modelos asiáticos, sino que también desarrollaron sus propias soluciones.

En Nueva España hay pocas referencias explícitas a los biombos de laca europeos, pero resulta de gran interés una mención del inventario de bienes del marqués de Guardiola de 1751: “Yt un rodastrado de maque encarnado inglés, en 500 pesos” [28]. Este rico ajuar tenía once biombos, incluyendo cinco de laca china y otros cinco novohispanos. Así pues, la excepcional referencia a un biombo inglés debe ser correcta. Dado que se trata de

un rodastrado, la obra debe haberse hecho *ex profeso*. Al respecto, cabe recordar el importante lote de muebles de laca roja que Giles Grendey hizo hacia 1730, probablemente para un cliente español, y que se conserva en el palacio de Lazcano [43]. Aunque se sabe poco acerca de las obras que los personajes más ricos de la Nueva España encargaron a Europa, su gusto por la ostentación y por los biombos lujosos son bien conocidos. Por otro lado, si bien los biombos de *japanning* inglés no son comunes, se conserva un ejemplar de seis hojas y dos haces, uno de los cuales es rojo y el otro verde oscuro [15] (p. 172).

Aunque son escasas, las lacas europeas sí aparecen en los ajuares novohispanos. Las referencias conocidas se hallan en inventarios de gran poder adquisitivo y están tasadas a precios muy altos. De hecho, la laca más costosa de la que se tiene noticia en Nueva España es un “Un Relox de Elicot, con Musica y Caxa de Maque blanco” [44] tasado a mil pesos en el inventario de bienes del conde de Xala, en 1784. Así, el rodastrado de laca inglesa del marqués de Guardiola sugiere que en el siglo XVIII los biombos formaron parte, ocasionalmente, de los encargos de lacas de lujo que desde Nueva España se hacían a los prestigiosos lacadores ingleses.

### 3.4 Biombos novohispanos de laca

Aunque los biombos chinos de laca tuvieron una circulación importante en Nueva España, los biombos de laca de factura doméstica fueron más numerosos y estuvieron al alcance de sectores más amplios de la población. Al respecto, hay evidencias documentales, así como materiales:

**Tabla 3 Biombos novohispanos de laca**

| Descripción de los biombos novohispanos de laca                                                                                                        |
|--------------------------------------------------------------------------------------------------------------------------------------------------------|
| “Un biobo de maque de China hecho aquí”. [45]                                                                                                          |
| “Un biobo de maque criollo.” [46]                                                                                                                      |
| “Yt un biobo de cama maqueado de negro de dos varas y media de alto, dos tercias de ancho en cotense de un haz y diez tablas en dieciocho pesos.” [47] |
| “Otro rodastrado de pintura y cotense maqueado con veinte tablas en 25 pesos.” [48]                                                                    |
| “Yt un biobo maqueado nuevo con diez tablas en veinte y cinco pesos” e “Yt un rodastrado de diez tablas maqueado en ocho pesos”. [49]                  |
| “Yt un bioguito de estrado de 21 tablas en dos pedazos amaqueado en 10 pesos.” [50]                                                                    |
| “Otro [biombo] sobre cotense, de dos haces, por un lado maqueado, y por el otro pintura, con diez tablas, se avaluó en cincuenta pesos.” [30]          |

La referencia de 1696 al “biobo de maque de China hecho aquí” resulta de enorme interés. Se trata del único caso conocido donde se alude a un biombo “de China hecha aquí” y se puede inferir que, a diferencia de la mayoría de los biombos virreinales, este sí pretendía copiar las soluciones chinas. Es probable que en esa época la elaboración de biombos novohispanos de laca fuera muy reciente y aún no hubiera desarrollado características distintas a las de los biombos chinos; de ahí la contradictoria afirmación de que la obra era “de China hecha aquí.” El caso del “biobo de maque criollo” es similar y sugiere que los biombos novohispanos de laca hechos en Nueva España eran relativamente infrecuentes en 1708. La elaboración de biombos virreinales de laca se mantuvo durante todo



el siglo XVIII, pero las referencias posteriores no vuelven a referirse a ellos en términos similares.

Entre los biombos novohispanos conservados, escasean los ejemplares que exhiban una clara voluntad de copiar los modelos chinos. Al respecto destaca, sin embargo, un biombo de dos haces, cuyo anverso representa la Conquista de México y está firmado por Pedro de Villegas en 1718 [51]. Lo que nos interesa, sin embargo, es el reverso, que imita el efecto de los biombos de laca china, con paisajes, arquitectura y flores inspirados en los aquellos, que conviven con figuras occidentalizadas, como una fuente. La obra incluye nubes doradas procedentes de los biombos japoneses pintados, pero por lo demás, la proximidad con las soluciones chinas es muy marcada.

Por otro lado, en las referencias documentales a los biombos chinos nunca se mencionan materiales como el palo y el cotense, que en los casos registrados en la tabla aluden sutilmente al origen virreinal. No sabemos qué técnicas se usaron en esta clase de biombos. El empleo de técnicas pictóricas -probablemente ayudadas por barnices- para producir efectos similares a la laca era común en España. Por otro lado, también podrían haberse utilizado técnicas similares a las de los biombos de laca europea. En España existían, en el siglo XVIII, lacadores que hicieron obras tan diversas como coches y biombos. En Nueva España, hasta donde se sabe, no existió el oficio de lacador, pero en el siglo XVIII los carroceros incursionaron en el trabajo de la laca, sin duda usando técnicas europeas [38] (p. 385). Hacia 1730, Antonio Cuervo, carroceros activo en la ciudad de México, hizo un escaparate de laca encarnada [15] (pp. 174-176); el color coincide con el de la mayoría de los biombos achinados que se conservan (Figs. 6 y 7). Esto sugiere la influencia del mueble inglés de laca roja, que también fue muy popular en España en la primera mitad del siglo XVIII, desde donde esta moda se difundió a Nueva España.

Ante la falta de información sobre la técnica empleada en los biombos novohispanos de laca, resultan de interés los comentarios de Silvano Acosta Jordan sobre el uso de chinerías en obras como retablos y peanas procesionales de las Islas Canarias:

La adaptación o interpretación de los diseños originales sobre policromías constituyó un juego creativo muy interesante, pues cuando se aplicaron sobre retablos, marcos, atriles, etc., no se hicieron siguiendo las elaboradas técnicas originales, sino bajo los procedimientos pictóricos que Europa venía aplicando desde la Baja Edad Media...en Canarias se yuxtaponen técnicas policromas, como el óleo o temple, sobre preparaciones de blanco de plomo o yeso. Sobre estas preparaciones se aplica indistintamente un tono base de fondo, predominando los rojos o negros orgánicos, mezclados con aglutinantes grasos o proteicos. Hemos observado muy pocos ejemplos de acabados en estado original, pues desgraciadamente su apariencia ha sido interpretada como barnices envejecidos, siendo eliminados sistemáticamente...[52]

Asimismo, al hablar del trabajo pictórico de un retablo cuyo autor se desconoce, Acosta añade

La técnica polícroma parte de un trabajo de carpintería en madera de conífera ensamblado a tope y reforzado con clavos de forja. La preparación es de yeso y sobre esta se halla una capa gruesa de negro orgánico. Los motivos representados fueron ejecutados a punta de pincel, usando como medio pictórico polvo de oro aglutinado con cola proteica. El dibujo se aplicó muy delicadamente a punta de pincel sobre el dorado, empleando idéntico procedimiento pictórico [52] (p. 41).

En Nueva España, el trabajo de la laca no estaba regulado por ningún gremio, lo que no impidió que se realizara gran número de obras. ¿Sería posible que Villegas y otros pintores hicieran los dos haces de los biombos que muestran por un lado pintura y por el

otro maque? De hecho, la obra de Villegas recuerda la referencia de 1737 a un biombo que tenía “Por un lado maqueado y por el otro pintura”. Al respecto, tienen interés los comentarios de Romero de Terreros sobre

un biombo pintado al óleo sobre tela [que] imitaba por un lado una mampara de laca de Coromandel, con tal maestría ejecutada, que solamente de cerca y al tacto se comprobaba que no estaba hecha de madera laqueada sino de pintura sobre lienzo. En el centro de una multitud de característicos motivos decorativos chinos se destacaba un gran medallón, poblado [...] de figuras europeas [...] pero interpretadas con criterio oriental [...] que el biombo fué confeccionado en la Nueva España lo comprueba plenamente su anverso, en el cual se representó una escena netamente mexicana. Es por lo tanto evidente que el anónimo pintor tuvo a la vista un legítimo biombo chino que copió por un lado, mientras que el otro lo ejecutó a mano libre [53].

Pese a que la producción de biombos novohispanos de laca comprende todo el siglo XVIII, no hay indicios de que fueran tan populares como para que hubiera artistas especializados en ellos. Por otro lado, el encargar cada lado del biombo a un artista distinto, habría encarecido la obra. El precio de 50 pesos por un biombo “sobre cotense, de dos haces, por un lado maqueado, y por el otro pintura” de diez tablas es relativamente alto, pero de ningún modo excepcional en el contexto novohispano. El hecho de que el soporte del biombo fuera textil -incluso en la parte maqueada- sugiere que se hizo en un taller de pintura.

No sabemos qué tan frecuente fue la elaboración de biombos en los talleres de maque de Michoacán y Guerrero. Salvo por la referencia de *Tardes americanas*, no hay evidencias de que tales muebles formaran parte de su producción habitual. En su mayoría, esos talleres consistía elaboraban bateas, costureros, o muebles pequeños. Como se ha visto, la fabricación de biombos novohispanos de maque empezó varias décadas antes que el trabajo de De la Cerda. Así, los biombos de laca de Pátzcuaro serían solo una parte del fenómeno de los biombos novohispanos de maque.

Por otro lado, los biombos novohispanos de maque tenían notables diferencias de precio: los de diez hojas podían variar entre los 8 y los 25 pesos. Esto sugiere que hubo diferencias de calidad, que sin duda también obedecen a que hubo distintos talleres que se involucraron en el trabajo. Si bien las diferencias de precio respecto a los biombos de laca china son aún más notables, el mercado de las obras novohispanas no necesariamente fue de bajo poder adquisitivo: en 1737, el próspero José del Barrio, caballero del Orden de Santiago y poseedor de muchas obras asiáticas, tenía un biombo “sobre cotense, de dos haces, por un lado maqueado, y por el otro pintura, con diez tablas, se avaluó en cincuenta pesos” [30] de indudable factura novohispana. El hecho de que incluso quienes podían permitirse obras chinas originales tuvieran biombos novohispanos, sugiere cierto reconocimiento a la calidad de las obras. Las diferencias entre las obras asiáticas y las novohispanas inspiradas en ellas son fáciles de advertir. Así, el biombo de Barrio y aquel firmado por Villegas, sugieren que los sectores privilegiados del virreinato no solo se aficionaron al arte asiático, sino también a las obras novohispanas que lo tomaron como punto de partida para hacer propuestas propias.

### 3.5. Biombos de laca fingida

Si la existencia de biombos novohispanos de laca plantea dudas respecto a las técnicas usadas y los talleres en las que se hicieron, el tema se vuelve aún más complejo en el caso de los biombos de maque fingido. En España y otras naciones europeas hay referencias a obras “de charol legítimo” y otras “contrahechas de charol”; los investigadores han

señalado que el “charol legítimo” es la laca asiática [38] (p. 172), mientras que el “contra-hecho” es la laca de otros orígenes [38] (p. 233). Sin embargo, el análisis de la siguiente tabla sugiere que el caso en Nueva España fue un poco distinto:

**Tabla 4**

| <b>Imitation Lacquer Screen Description</b>                                                          |
|------------------------------------------------------------------------------------------------------|
| “Un biobo nuevo fingido de maque en veinte y cinco pesos” [54]                                       |
| “Un rodastrado, bueno, de once tablas, de maque blanco fingido, tasado en quince pesos.” [2] (p. 27) |
| “Un rodastrado achinado y maqueado fingido de 24 tablas de a vara en 80 pesos.” [55]                 |

Las diferencias entre los biombos novohispanos fingidos de laca y aquellos de laca no resultan evidentes en las descripciones. Unas y otras datan de los mismos años y tanto los precios como la referencia a la buena calidad sugiere que los biombos fingidos de maque fueron al menos tan valorados como los de maque. La referencia de 1732 es de especial interés, pues se trata del precio más alto hasta ahora conocido para un biombo novohispano de maque. Esto en parte se debe a que se trata de un rodastrado de 24 tablas, seguramente hecho sobre pedido. La diferencia de precio no es muy grande respecto a “Un arrimador de maque de China, con 23 tablas, de vara y media de alto, apreciado en 115 pesos” [33], que en 1695 se hallaban entre los bienes de la rica marquesa de San Jorge.

El rodastrado achinado y maqueado fingido de 1732 también destaca porque proviene de la carta de dote del primer matrimonio del prominente conde de Santiago Calimaya, lo que permite suponer que esta clase de obras podían llegar a tenerse en muy alta estima. Aunque no se menciona el color, acaso la obra haya sido similar a un rodastrado que se dio a conocer en 1970 (Figure 6), cuando se conservaba en dos partes, cada una de las cuales tenía seis hojas [1] (pp. 83-86). Posteriormente se señaló que las obras habían estado unidas [32] (p. 92). Ambas se relacionan estrechamente entre sí, pues muestran distintos lugares de la Ciudad de México. Se trata de un trabajo notable que, al parecer, se hizo en un taller de pintura; el fondo rojo, sin embargo, imita los biombos de laca chinos, lo mismo que las aves de largas colas, inspiradas en el feng-huang.

Por su parte, la referencia de 1720 a un “rodastrado, bueno, de once tablas, de maque blanco fingido, tasado en quince pesos” es sugerente respecto al papel de la laca europea en el desarrollo de los biombos novohispanos de laca. Como se ha señalado, la laca blanca surgió en Europa y llegó a emplearse en biombos en España, como en el “biombo de charol con ocho hojas, fondo color de perla matizado con diferentes figuras, y flores de papel cortado a dos haces tiene cada hoja un pie y nueve dedos de ancho seis y seis de alto” [38] (p. 392) que perteneció a Isabel de Farnesio. Al respecto, también es de interés una excepcional referencia de 1769 a “dos cajones largos sin número ni marca que contienen dentro dos beobos de maque blanco cada uno con doce hojas”, valorados en 25 pesos cada uno. Estas obras se habían enviado de Cantón a Manila [4] (p. 37). El hecho de que se trate de una obra poco común enviada al enclave español en Asia en una fecha tardía permite suponer que los biombos chinos de laca blanca surgieron para satisfacer las demandas previamente desarrolladas en Hispanoamérica [56]. Sin embargo, la verdadera laca china de este periodo no podía hacerse en blanco, así que es probable que estas piezas tuvieran un yeso pulido u otro fondo blanco.

Por otro lado, tanto en Europa como en América el trabajo de laca a veces era obviado o denominado “pintura”. En Nueva España, esto ocurría tanto en el caso de las obras

chinas como virreinales [15] (p. 147). Por esa razón, resulta difícil saber si algunos de los biombos que las fuentes llaman achinados se hicieron en los mismos talleres donde se elaboraron los biombos a los que nos hemos referido antes. Pero, al margen de la técnica, no hay duda de que formaban parte del nutrido grupo de obras virreinales que se desarrollaron a partir de los biombos chinos de laca. Ahora bien, los biombos no fueron las únicas obras que los documentos describieron como achinadas; por el contrario, en los documentos novohispanos abundan las referencias a baúles, taburetes, mesas de estrado y roperos achinados. Es probable que estas obras se hayan hecho en distintos tipos de talleres y que el adjetivo “achinado” no se relacionara con una técnica, sino con ciertos efectos que se podían lograr mediante distintos procedimientos.

**Tabla 5.** Biombos achinados

| Descripción de los biombos achinados                                                                                                                                    |
|-------------------------------------------------------------------------------------------------------------------------------------------------------------------------|
| “Yt un biobo achinado de unas 10 tablas viejo en 7 pesos”. [57]                                                                                                         |
| “Un rodastrado de 12 tablas, de vara y tercia de alto y dos tercias de ancho, de pintura achinada y remates de una sesma de oro falso a sisa, en 25 pesos”. [2] (p. 28) |
| “Otro dicho [biombo], achinado, de 8 tablas, en 10 pesos”. [2] (p. 28)                                                                                                  |
| “Un biombo de dos haces, achinado, de dos varas y tercia de alto, maltratado, en 20 pesos”. [2] (p. 29)                                                                 |
| “[Un biombo] de dos haces de crudo, pintura achinada”. [30]                                                                                                             |
| “Un biobo de estrado de doce tablas ya servido pintado a la moda de china sobre encarnado con su zenefa de oro ancha en cotence crudo y en catorce pesos”. [59]         |
| “Dos biombos achinados, ordinarios, de dos varas de alto; el uno maltratado, en 7 pesos”. [2] (p. 32)                                                                   |
| “Un biogo achinado de oro de dos haces” y otro “ordinario achinado”. [26] (p. 237)                                                                                      |
| “221. Un rodastrado encarnado achinado sin tarjas en 10 pesos”. [36]                                                                                                    |

Varias de las referencias anteriores introducen adjetivos que sugieren una calidad menor: “viejo” (que contrasta con “antiguo”, usado en relación con obras que se valoran no obstante el paso del tiempo), “ya servido”, “ordinario”. Los precios registrados son más bajos que los de los biombos de maque y fingidos de maque. Sin embargo; no todas las obras se consideraron sucedáneos del trabajo de buena calidad; las referencias al “rodastrado de 12 tablas, de vara y tercia de alto y dos tercias de ancho, de pintura achinada y remates de una sesma de oro falso a sisa, en 25 pesos” y al “biogo achinado, de oro, a dos haces, 29 pesos” sugieren un trabajo similar al que hemos comentado en los apartados anteriores.

Aún así, llama la atención que algunas menciones documentales a los biombos achinados se refieran a ellos como “ordinarios”. No hay duda de que esas obras fueron hechas en talleres de pintura de poco renombre; probablemente no se trate de encargos, sino de trabajos hechos para el mercado abierto. Este trabajo se ha perdido, por lo que no está claro cuáles eran sus características. En cualquier caso, este segmento de la producción sugiere que, aunque el fenómeno de los biombos chinos de laca estuvo originalmente reservado a los grupos de mayor poder económico, a lo largo del siglo XVIII el fenómeno alcanzó también a los novohispanos de bajo poder adquisitivo.

Algunas obras no solo se describen como achinadas, sino también como encarnadas. Es probable que se trate de trabajos similares a los que comentamos en el apartado anterior, salvo por el uso de barniz y el brillo parecido al de la laca. Por otro lado, vale la pena advertir que ciertas referencias documentales mencionan biombos encarnados sin aludir ni a la laca ni a los biombos chinos o achinados<sup>i</sup>. Al respecto, aún se conservan varios ejemplares; por ejemplo, el biombo de las Naciones del Museo Franz Mayer de la Ciudad de México (Figure 7), el biombo de los emblemas de Otto Van Veen del Dallas Museum of Art y el biombo con vistas y paisajes que se exhibe en el Museo Internacional del Barroco de Puebla. Al igual que las obras antes discutidas, los biombos encarnados se diversificaron significativamente en términos de calidad. El que se hicieran muchos biombos de fondo rojo que carecían de cualquier otro parecido con los biombos de laca demuestra que una vez arraigado, el gusto por esta clase de biombos se diversificó tanto que, en ocasiones, la huella asiática llegó a diluirse casi totalmente.

#### 4. Discussion

Desde fines del siglo XVI, la Nueva España tuvo una relación directa con Asia, que propició que el gusto por los biombos se arraigara localmente más que en cualquier otro lugar fuera de Asia. Hacia 1700, las lacas europeas y en general la moda de la *chinoiserie* se expandió a América y repercutió en los biombos novohispanos de laca, de modo que, en su diversidad, las obras novohispanas permiten advertir el papel que la Nueva España desempeñó en la mundialización artística de la época.

El fenómeno mundial de la laca de los siglos XVII y XVIII es muy amplio debido a la coexistencia de técnicas. Esto es particularmente cierto en relación con los biombos de laca que circularon en Nueva España en el siglo XVIII. Como se ha visto, los primeros ejemplares que se conocieron fueron asiáticos, principalmente chinos; algunos estaban adaptados al consumo novohispano mientras que otros fueron comunes a otros ámbitos occidentales. También circularon, ocasionalmente, biombos europeos. Pero lo que hizo que el fenómeno de los biombos de laca fuera realmente complejo fueron los ejemplares novohispanos, que involucraron tantos procedimientos, tipos de talleres y centros de producción, que a menudo resulta imposible saber *a priori* cuál fue la técnica empleada.

Esto no quiere decir que debamos renunciar a la identificación de las técnicas usadas en estos biombos. Todo lo contrario; la mayoría de los objetos y muebles pequeños de laca virreinal se hicieron en talleres regionales, cuyas técnicas cada vez se conocen mejor. Su comparación con la técnica de los biombos de laca virreinales conservados será fundamental para conocer mejor los verdaderos alcances del fenómeno de la laca en Nueva España. La comparación de los procedimientos empleadas en distintas obras, como el biombo de la entrada del virrey que se ha creído que fue hecho en Pátzcuaro y los ejemplares del Museo Franz Mayer, del Museum of Fine Arts de Houston y del Dallas Museum of Art sin duda permitirá responder a preguntas como ¿Las técnicas de laca empleadas en los biombos coinciden con las que se emplearon en otros objetos? ¿En qué clase de talleres se hicieron? ¿Hasta qué punto los pintores se involucraron en este trabajo?

A reserva de lo que encuentren futuros estudios, es probable que los biombos achinados y encarnados solo en casos excepcionales se hayan hecho en talleres regionales de laca. Al respecto, tiene interés mencionar que al referirse a la laca de Michoacán, Granados y Gálvez señaló que en su mayoría era negra [16] (p. 117). Esto puede apreciarse en los objetos de laca michoacanos que se conservan, en los que el uso de fondos rojos es excepcional.

En cualquier caso, los biombos novohispanos de maque no resultan de una recepción pasiva de los ejemplares asiáticos, pues rara vez intentan copiarlos sin más. Más aún, las

propias obras asiáticas se moldearon para satisfacer los gustos locales. Este es un tema en el que futuros estudios deberán profundizar pues, aunque en el siglo XVIII el lugar fuera de Asia donde los biombos asiáticos fueron más exitosos fue la Nueva España, las características de esos biombos aún no se conocen lo suficiente.

A la vez, la circulación de los biombos chinos de laca en Nueva España coincidió con la llegada de las lacas europeas. Dado que en Madrid al menos desde 1680 se estaban haciendo biombos de laca, es lógico suponer que algunos biombos novohispanos de laca se relacionan con las obras europeas informadas en las asiáticas. Si bien en Europa se desarrollaron distintas técnicas de laca, la diversidad fue aún más notable en Nueva España, donde coexistieron lacas hechas con procedimientos europeos, así como regionales de origen prehispánico y técnicas de pintura que imitaban la laca, todas las cuales se emplearon, en ocasiones, para hacer biombos.

Las consecuencias de esta diversidad aún no han sido aquilatadas. En la historiografía del arte novohispano, se mantiene arraigada la idea de que el arte asiático se ligó con el lujo, pese a que se ha demostrado que no siempre fue así. La seda china podía, de hecho, ser barata [60], y lo mismo es cierto respecto a la porcelana. Como se ha visto, los biombos de laca china solían ser costosos y se ligaban, en efecto, al lujo. Pero la circulación de estas obras detonó muchas producciones locales, algunas de las cuales se extendieron a varios grupos sociales. A la vez, aunque la técnica y paleta de las lacas europeas, y de los biombos europeos de laca ejercieron una notable influencia sobre los biombos virreinales de laca, algunas de estas obras siguieron sus propios derroteros, totalmente desligadas de las obras transoceánicas.

**Supplementary Materials:** “La version en inglés de este artículo puede descargarse de: <https://doi.org/10.3390/heritage6050226>”

**Financiación:** Esta investigación fue financiada por el Consejo Nacional para la Ciencia y la Tecnología (CONACYT) de México mediante el proyecto A1-S-35719..

**Declaración de disponibilidad de datos:** Los datos presentados en este estudio están disponibles en el Archivo General de la Nación de México, ramos Vínculos y Mayorazgos y Civil; Archivo General de Notarías y Archivo General de Notarías de Puebla..

**Agradecimientos:** “La autora agradece a Monica Katz, Lucia Burgio y Dana Melchar por su ayuda con la versión inglesa de este texto, a Monika Kopplin por sus valiosas sugerencias respecto a los temas aquí discutidos y a Joana Fonseca, Silvia Pinna, Abraham Villavicencio, Mariana Sainz, Tania Vargas y The Museum of Fine Arts, Houston, por amablemente haber facilitado las imágenes incluidas en este texto.”

**Conflictos de intereses:** La autora declara no tener ningún conflicto de interés.

## References

- Castelló Yturbide, T.; Marita Martínez del Río de Redo. *Biombos Mexicanos*; Instituto Nacional de Antropología e Historia: Ciudad de México, México, 1970.
- Curiel, G. Los biombos novohispanos: escenografías de poder y transculturación en el ámbito doméstico. En *Viento Detenido: Mitologías e Historias en el arte del Biombo*; Museo Soumaya: Ciudad de México, México, 1999; pp. 9–32.
- Baena Zapatero, A. Chinese and Japanese Influence on Colonial Mexican Furniture: The Achinado Folding Screens. *Bull. Port.-Jpn. Stud.* 2010, 20, 95–123.
- Baena Zapatero, A. Un ejemplo de mundialización: El movimiento de biombos desde el Pacífico hasta el Atlántico (s. XVII–XVIII). *Anu. Estud. Am.* 2012, 69, 31–62.
- Ocaña Ruiz, S.I. Conexiones transoceánicas: Nueva España y la expansión del gusto por los biombos. *Res Mobilis. Rev. Int. Investig. Mobil. Obj. Decor.* 2021, 10, 103–129.
- Castelló Yturbide, T. *El arte del Maque en México*; Fomento Cultural Banamex: Ciudad de México, México, 1980.
- Pérez Carrillo, S. *La laca Mexicana: Desarrollo de un Oficio Artesanal en el Virreinato de la Nueva España Durante el Siglo XVIII*; Alianza/Ministerio de Cultura/Dirección General de Cooperación Cultural: Madrid, España, 1990.
- Lacas: color y brillo novohispano*. Instituto Nacional de Antropología e Historia: Ciudad de México, México, 2017.
- Codding, M. The Lacquer Arts of Latin America. In *Made in the Americas. The New World Discovers Asia*; Museum of Fine Arts: Boston, EEUU, 2015, pp. 75–89.
- Acuña Castellón, P. *El Maque o Laca Mexicana, la Preservación de una Tradición Centenaria*; El Colegio de Michoacán-Fideicomiso “Felipe Teixidor y Montserrat Alfau de Teixidor”: Zamora, México, 2012.
- Gómezjurado Garzón, A.J. *El Barniz de Pasto. Testimonio del Mestizaje Cultural en el Sur-Occidente Colombiano 1542–1777*; Ministerio de Cultura, Fundación Mundo Espiral: Pasto, Colombia, 2017.
- Kopplin, M. *European Lacquer. Selected Works from the Museum für Lackkunst Mairister*; Hirmer Verlag: Munich, Alemania, 2010.
- Pérez Carrillo, S. “Imitación de la laca oriental en muebles novohispanos del siglo XVIII”. *Cuad. Arte Colonial* 1987, 3, 51–78.
- Pérez Carrillo, S. & Rodríguez de Tembleque, C. “Influencias orientales y europeas.” En *Lacas Mexicanas*; Museo Franz Mayer: Ciudad de México, México, 1997; pp. 31–52.
- Ocaña Ruiz, S. De Asia a la Nueva España vía Europa: lacas asiáticas y achinadas en el siglo XVIII. *An. Inst. Investig. Estéticas* 2017, 39, 131–188.
- Granados y Gálvez, J.J. *Tardes americanas. Gobierno Gentil y Católico; Breve y Particular Noticia de Toda la Historia Indiana*; Felipe de Zúñiga y Ontiveros: Ciudad de México, México, 1778, 117.
- Kasl, R. Witnessing Ingenuity. Lacquerware from Michoacán for the Vicerine of New Spain. *Metrop. Mus. J.* 2022, 47, 40–55.
- Ajofrín, F. *Diario del Viaje Que Hizo a la América en el Siglo XVIII el P. Fray Francisco de Ajofrín*; Instituto Cultural Hispano-Mexicano: Ciudad de México, México, 1964; p. 160.
- Ocaña Ruiz, S.I.; Arimura, R. Japanese Objects in New Spain. Nanban Art and Beyond. *Colonial Lat. Am. Rev.* 2022, 31, 327–353.
- Ocaña Ruiz, S. Marcos enconchados: autonomía y apropiación de formas japonesas en la pintura novohispana. *An. Inst. Investig. Estéticas* 2008, 30, 107–154.
- Ocaña Ruiz, S. Las elusivas huellas de los biombos japoneses en los virreinales (siglos XVII y XVIII)”. En *Identidades y Redes Culturales. V Congreso Internacional de Barroco Iberoamericano*; Ministerio Cultural de Cultura y Deporte: Granada, España, 2021; pp. 861–869.
- Sanz de la Higuera, F.J. Tocador y biombo en los interiores domésticos del Burgos del setecientos. *Mobiliario para la vanidad. Futuro Pasado* 2020, 11, 193–226.
- Impey, O.; Jörg, C. *Japanese Export Lacquer 1580–1850*; Hotei Publishing: Amsterdam, Holanda, 2005.
- Impey, O. *Japanese Export Porcelain: Catalogue of the Collection of the Ashmolean Museum*; Ashmolean Museum: Oxford, Inglaterra, 2003.
- Pierson, S. The Movement of Chinese Ceramics: Appropriation in Global History. *J. World Hist.* 2012, 23, 9–39.
- Baena Zapatero, A. Reflexiones en torno al comercio de objetos de lujo en el Pacífico siglos XVII y XVIII. In *A 500 Años del Hallazgo del Pacífico. La Presencia Novohispana en el Mar del Sur*; Universidad Nacional Autónoma de México: Ciudad de México, México, 2016, pp. 217–252.
- AGNM, Vínculos y Mayorazgos, Vol. 3, Exp. 1. 1729. Autos e inventarios de Luisa María Sánchez de Tagle, Marquesa de Altamira, Querétaro.
- AGNM, Vínculos y Mayorazgos, Vol. 48, Exp. 7, 1751, fs. 25v, 26r y 95v. Autos e inventarios por los bienes del Marqués de Guardiola.
- Velázquez, M. El Marqués de Altamira y las Provincias Internas de Nueva España; El Colegio de México: Ciudad de México, México, 1976.
- AGNM, Vínculos y Mayorazgos, Vol. 11, Exp. 3, 1737. Embargo de los bienes de la testamentaria de José del Barrio del Orden de Santiago.
- Disponible online: <https://www.christies.com/en/lot/lot-5418493> (consultado el 2 de enero de 2023).
- Curiel, G.; Rubial, A. Los espejos de lo propio: ritos públicos y usos privados en la pintura virreinal. En *Pintura y Vida Cotidiana en México 1650–195*; Fomento Cultural Banamex-Conaculta: Ciudad de México, México, 1999; pp. 144–145.

33. Curiel, G. El efímero caudal de una joven noble. Inventario y aprecio de los bienes de la marquesa doña Teresa Francisca María de Guadalupe Retes Paz Vera (ciudad de México, 1695). *Anales del Museo de América* 2000, 8, 89.
34. AGNM, Civil. Vol. 179, Exp. 8, 1704. Bienes del contador Don Bentura de Paz.
35. Vargaslugo, E. & Curiel, G. Juan Correa. Su vida y su obra, III, Cuerpo de documentos; UNAM-Instituto de Investigaciones Estéticas, Ciudad de México: México, 1991; p. 196.
36. AGNM, Vínculos y Mayorazgos. Vol. 59, Exp. 1, 1792. Testimonio de los inventarios extrajudiciales que se practicaron por muerte de la Sra Condesa de Xala, doña Gertrudis Ygnacia de la Coter y Rivascacho.
37. Ocaña Ruiz, S. Gustos, estrategias y precios en Nueva España. *An. Inst. Investig. Estéticas* 2015, 37, 101–102.
38. Ordóñez Goded, C. De Lacas y Charoles en España: Siglos XVI-XIX. Ph.D. dissertation. Universidad Complutense de Madrid-Facultad de Geografía e Historia-Departamento de Historia del Arte II [Moderno], Madrid, España, 2016; p. 73.
39. Huth, H. *Lacquer of the West. The History of a Craft and an Industry 1550-1950*; University of Chicago Press: Chicago, EEUU; Londres, Reino Unido, 1971; p. 76.
40. Lavalle Cobo, T. El coleccionismo oriental de Isabel de Farnesio. In *Oriente en Palacio. Tesoros Asiáticos en las Colecciones Reales Españolas*; Patrimonio Nacional: Madrid, España, 2003.
41. García Fernández, M.S. Les Panneaux en laque de la chambre de Philippe V au palais de La Granja de San Ildefonso. En *Philippe V d'Espagne et L'art de Son Temps. Acts du Colloque des 7, 8 et 9 Juin 1993 á Sceaux*; V. II. Musée de l'Ile-de-France: Domaine de Sceaux, Francia, 1995; pp. 193–207.
42. Ordóñez Goded, C. El mueble de laca española. Conexiones con Europa y Asia. *Res Mobilis. Rev. Int. Investig. Mobil. Obj. Decor.* 2021, 10, 69–88.
43. Ordóñez, C. Japanning en España. Un lote de muebles de laca escarlata realizado por Giles Grendey. *Estud. Moble* 2011, 14, 14–21.
44. Romero de Terreros, M. *Una Casa del Siglo XVIII en México*; Universidad Nacional Autónoma de México-Instituto de Investigaciones Estéticas: Ciudad de México, México, 1957; p. 60.
45. AGNot, Not. 14, Juan Aunzibay Anaya, Vol. 93, 1696–1701. Carta de dote, Francisco Joseph de la Puerta. (1708).
46. Archivo de Notarías Puebla: Not. 2, Caja 53, 1720–21, f. 9. Antonio de Robles y Samano. Memoria e inventarios de los bienes [...] por muerte de Don Manuel de Torrija y Rojo, regidor que fue de esta nobilísima Ciudad.
47. AGNM, Vínculos y Mayorazgos, Vol. 45, Exp. 3, 1725. Testamentaria de José Gil de Rivera.
48. AGNot, Notaría 70, “Carta de dote Juan Baptista Claros”, vol. 485, f. 171v. (1727).
49. AGNM, Civil. Vol. 179, Exp. 2. México, 8 de abril de 1727, casa que fue de Gertrudis Romeo difunta.
50. AGNM, Civil, Vol. 6, Exp. 1, 1732. Autos e inventarios por la muerte de Miguel de Cuevas.
51. Pinna, S. El biombo de las tres culturas. De Nueva España al Segundo Imperio. *Quiroga* 2017, 12, 96–110.
52. Acosta Jordan, S. De la China vienen guarnecidas... Aspectos histórico-artísticos y técnicos de las Chinerías en Canarias. *Rev. Hist. Canar.* 2013, 195, 36–37.
53. de Terreros, M.R. El palacio de Chapultepec en 1700. *An. Inst. Investig. Estéticas* 1945, 4, 55–56.
54. Archivo de Notarías de Puebla: Not. 2, Caja 45, 1713, Antonio de Robles y Samano, f. 49. Nicolas de Guzman. Joseph de Rivero Pintado, recibo de dote.
55. AGNOT, Not 133, esc Juan José Cruz y Aguilar, 1731–1736, vol 837, f. 153v. 21 de junio 1732. Carta de dote de Juan Xavier Joachin Altamirano Legaspi, Conde de Santiago Calamaia.
56. Baena Zapatero, A. El comercio de biombos en el Pacífico (1582-1785). In *Espacios de Tránsito: Procesos Culturales Entre el Atlántico y el Pacífico*; Montoya Ramírez, M.I., Sorroche Cuerva, M.A., Eds.; Universidad de Granada: Granada, España, 2014; p. 164.
57. AGNM, Civil, Vol. 17, Exp. 2. 1732. Marcelo Muñoz de Therán difunto, Ciudad de México.
58. AGNM, Vínculos y Mayorazgos, 75, Exp. 9, 1748. Joseph de Gorraes.
59. AGNM, Civil, vol 301, exp. 1, f. 19. 1727. Alonso Gutiérrez Deza.
60. Bonialian, M. *La Seda China en Nueva España a Principios del Siglo XVII. Bienes, Mercado, Comercio y Cultura del Consumo Desde México Hasta Buenos Aires*; Biblos-Instituto Mora: Buenos Aires, Argentina; Ciudad de México, México, 2014.

**Disclaimer/Publisher’s Note:** The statements, opinions and data contained in all publications are solely those of the individual author(s) and contributor(s) and not of MDPI and/or the editor(s). MDPI and/or the editor(s) disclaim responsibility for any injury to people or property resulting from any ideas, methods, instructions or products referred to in the content.
